# Supplementary material for: Genotype-Phenotype Correlation in WT1 Exon 8 to 9 Missense Variants
Source: PubMed Central journal article supplement — Kidney Int Rep. 2021 May 19;6(8):2114–21. doi: 10.1016/j.ekir.2021.05.009 (PMC8343804; doi:10.1016/j.ekir.2021.05.009), 2021-05-19
Supplement: mmc1.pdf [file mmc1.pdf]

## **Supplemental Material Table of Contents**

Supplemental Figure S1. Schema of functional analysis

Supplemental Figure S2. Luciferase analysis

Supplemental Figure S3. Western blot analysis of WT1 proteins

Supplemental Figure S4. Electrostatic surface potential of DNA binding region

Supplemental Table S1. Primers for cloning and mutagenesis

Supplemental Table S2. Characteristics of 161 cases

## Supplemental Figure S1. Schema of functional analysis

① Creates a luciferase gene containing the sequence to which the WT1 protein binds

② Transfection of plasmids to HEK293T cells

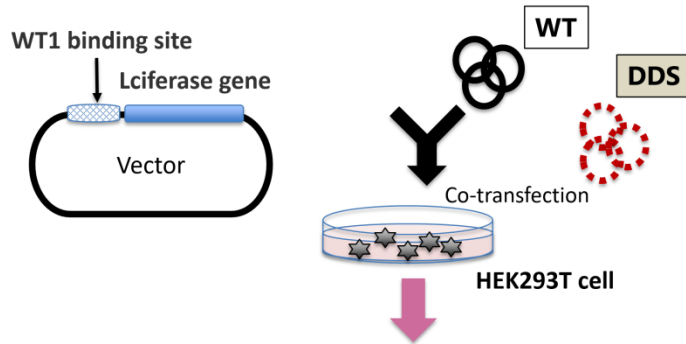

③ Luminescence was quantified

## Supplemental Figure S2. Luciferase analysis

A) The promoter activities associated with all mutations upon transfection with wild-type or mutant vectors are shown. R467W (p.Arg467Trp), R439H (p.Arg439His), and Q442H (p.Gln442His) were classified as the DBS group. C458R (p.Cys458Arg), H478R (p.His478Arg), and C433Y (p.Cys433Tyr) were classified as the C2H2 group. P455S (p.Pro455Ser), R463Q (p.Arg463Gln), and F437C (p.Phe437Cys) were classified as the Others group.

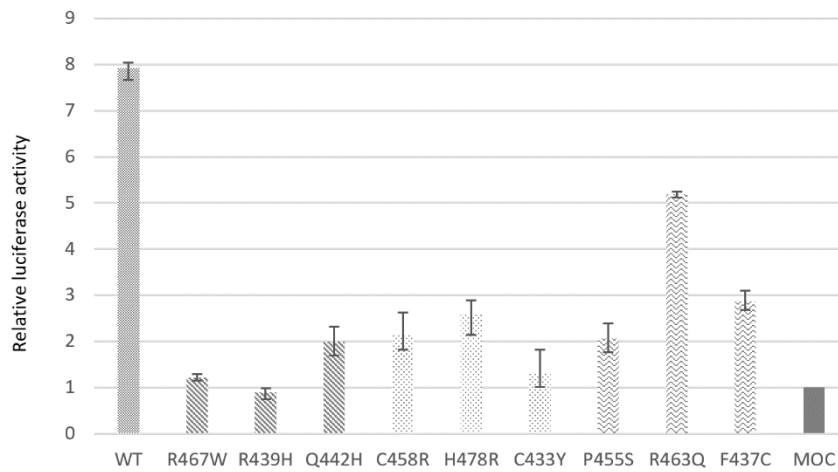

B) The promoter activities for all mutations upon (co-)transfection with wild-type and mutant vectors are shown.

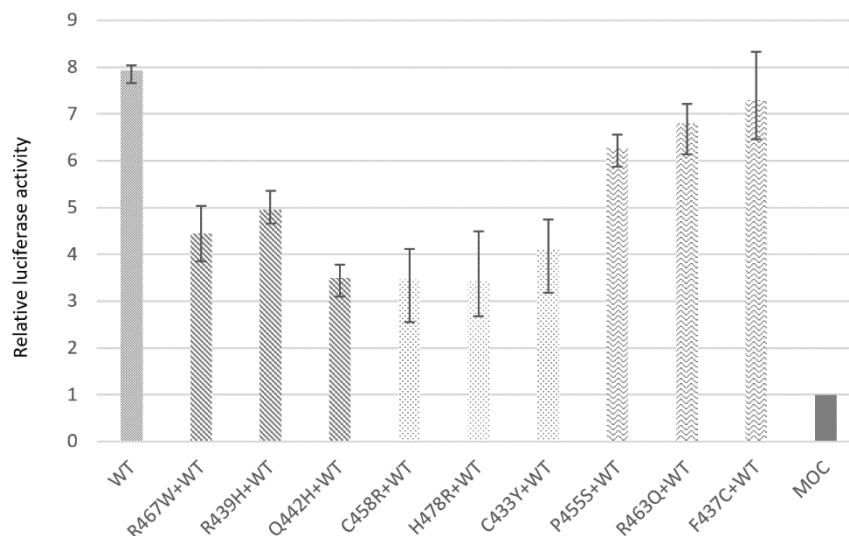

Supplemental Figure S3. Western blot analysis of WT1 proteins

Protein (2  $\mu$ g) was fractionated on 4%–20% Mini-PROTEAN<sup>®</sup> TGX<sup>™</sup> Precast Protein gels (Bio-Rad) and processed for western blotting with chemiluminescence detection.

The wild-type WT1 is shown in lane 1, DBS is shown in lanes 2–4, C2H2 is shown in lanes 5–7, and Others are shown in lanes 8–10.

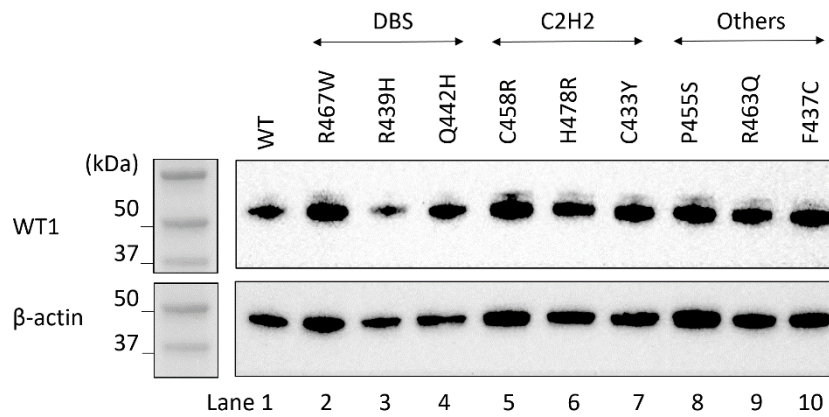

### Supplemental Figure S4. Electrostatic surface potential of DNA binding region

Electrostatic surface potential of only the DNA binding region in the zinc finger domain is shown. Positive to negative alterations of the surface charge in the DNA binding region were increased (more red-colored areas in mutants), and there was a tendency for a reduction of the region under these amino acid substitutions. These changes reduce the capacity for DNA binding.

a, wild type; b, p.Pro455Ser (Others); c, p.Arg467Trp (DBS); d, p.Cys458Arg (C2H2); e, p.His478Arg (C2H2); bar, 10 Å.

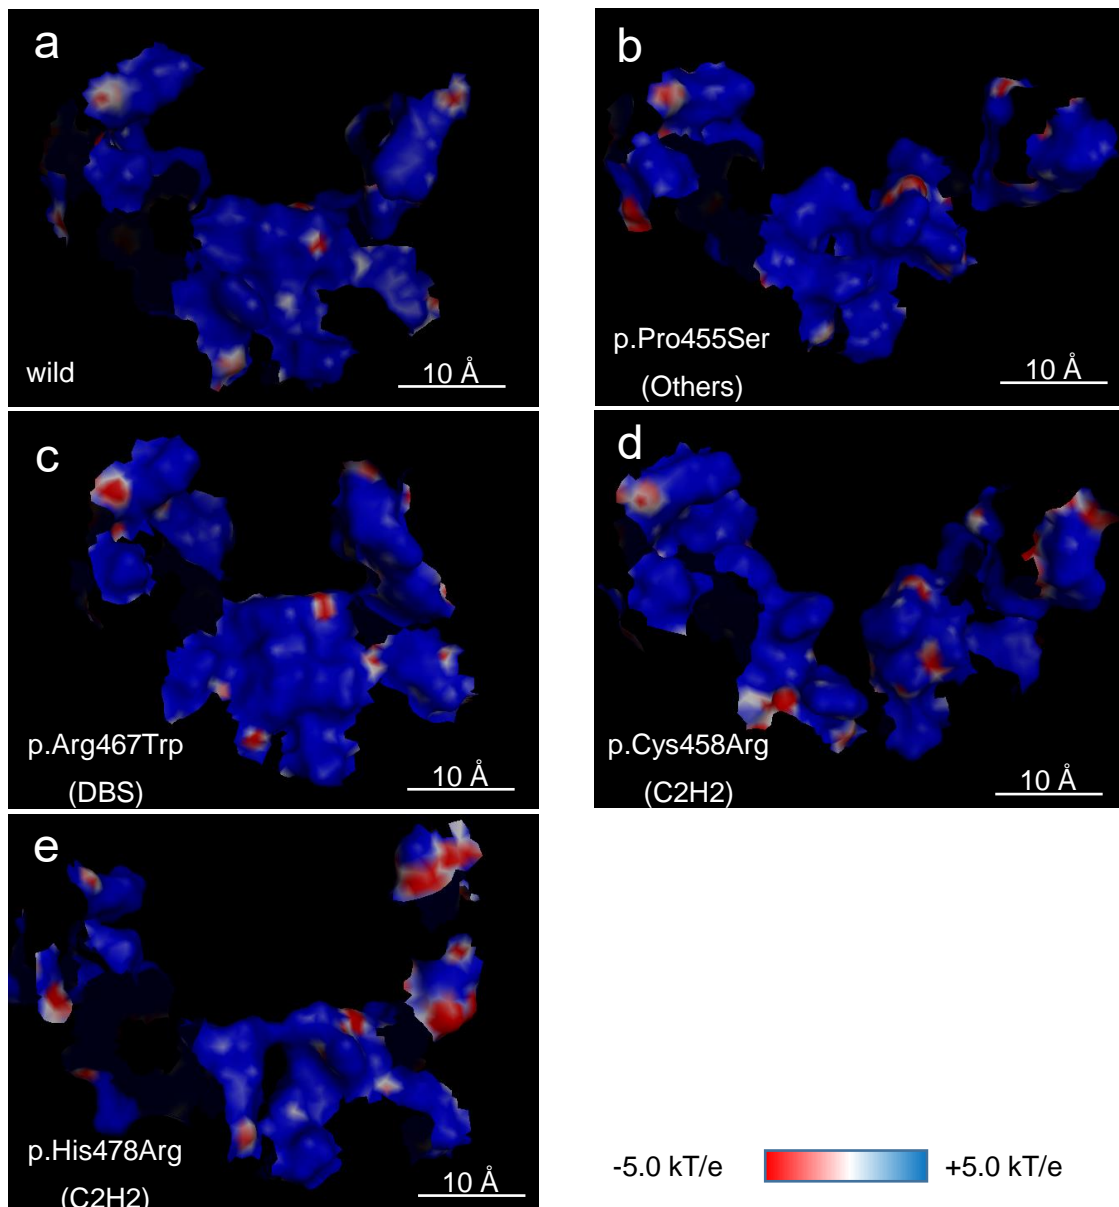

**Supplemental Table S1.** Primers for cloning and mutagenesis

|                  |   | 5'                                                                  | 3' |
|------------------|---|---------------------------------------------------------------------|----|
| Oligonucleotides | F | GTACCTGAGCTCGCTAGTGTGGGAGAGACACTAGAGGG<br>TATATAATGGAAGCTCGACTTCCAG |    |
|                  | R | TGATATCCTCGAGGCCTGGAAGTCGAGCTTCCATTATA<br>TACCCTCTAGTGTCTCTCCCACACC |    |
| p. Pro455Ser     | F | TGTGAAATCATTCCAGTGTA AAACTTG                                        |    |
|                  | R | TGGAATGATTTACACCTGTATGTC                                            |    |
| p. Cys458Arg     | F | ATTCCAGCGTAAAACCTGTCAGCGA                                           |    |
|                  | R | GTTTTACGCTGGAATGGTTTTACACC                                          |    |
| p. Arg467Trp     | F | GTTCTCCTGGTCCGACCACCTGAAG                                           |    |
|                  | R | TCGGACCAGGAGAACTTTCGCTGACA                                          |    |
| p. His478Arg     | F | AGGACTCGTACAGGTGAAAAGCCCTTC                                         |    |
|                  | R | ACCTGTACGAGTCCTGGTGTGGGTC                                           |    |
| p.Arg439His      | F | TTTTCTCATTCAGACCAGCTCAAAAG                                          |    |
|                  | R | GTCTGAATGAGAAAACCTTCGTTCA                                           |    |
| p.Gln442His      | F | CAGACCATCTCAAAAGACACCAAAG                                           |    |
|                  | R | TTTTGAGATGGTCTGAACGAGAAAA                                           |    |
| p.Cys433Tyr      | F | AAGGACTATGAACGA AGGTTTTCTCG                                         |    |
|                  | R | TCGTTCATAGTCCTTGAAGTCACACTG                                         |    |
| p.Arg463Gln      | F | TGTCAGCAAAAGTTCTCCCGGTCCGA                                          |    |
|                  | R | GAACTTTTGCTGACAAGTTTTTACACTG                                        |    |
| p.Phe437Cys      | F | CGAAGGTGTTCTCGT TCAGACCAGCT C                                       |    |
|                  | R | ACGAGAACACCTTCGTTTACAGTCCTTG                                        |    |

Supplemental Table S2. Characteristics of 161 cases

| No. | Sex | Age at onset (y) | Age at ESKD (y) | Extra-renal symptom | Wilms' tumor | Exon | Gene variants |           | Binding site | reference |
|-----|-----|------------------|-----------------|---------------------|--------------|------|---------------|-----------|--------------|-----------|
| 1   | M   | 6.30             | 6.30            |                     | No           | 8    | 1270A>G       | Lys424Glu | Others       | 1         |
| 2   | F   | 1.00             |                 | No                  | Yes          | 8    | 1282T>G       | Cys428Gly | C2H2         | 2         |
| 3   | F   | 1.00             | 1.00            |                     | Yes          | 8    | 1283G>A       | Cys428Tyr | C2H2         | 3         |
| 4   | F   | 1.00             | 1.00            |                     | Yes          | 8    | 1283G>A       | Cys428Tyr | C2H2         | 4         |
| 5   | F   | 1.30             | 10.00           | No                  | No           | 8    | 1297T>A       | Cys433Ser | C2H2         | 5         |
| 6   | F   | 0.40             | 0.50            | Yes                 |              | 8    | 1297T>C       | Cys433Arg | C2H2         | 6         |
| 7   | F   | 2.50             | 2.80            |                     | Yes          | 8    | 1298G>A       | Cys433Tyr | C2H2         | 6         |
| 8   | F   | 2.70             | 2.70            | No                  | No           | 8    | 1298G>A       | Cys433Tyr | C2H2         | 7,8       |
| 9   | F   | 0.17             |                 |                     |              | 8    | 1298G>A       | Cys433Tyr | C2H2         | 9         |
| 10  | M   | 1.75             | 1.75            |                     | No           | 8    | 1304G>C       | Arg435Pro | Others       | 11        |
| 11  | M   | 0.50             | 0.75            |                     | No           | 8    | 1309T>C       | Phe437Leu | Others       | 12        |
| 12  | M   | 11.00            |                 | No                  |              | 8    | 1310T>G       | Phe437Cys | Others       | 13        |
| 13  | F   | 0.08             | 0.08            |                     | No           | 8    | 1315C>T       | Arg439Cys | DBS          | 10        |
| 14  | F   | 0.00             | 0.08            |                     | No           | 8    | 1315C>T       | Arg439Cys | DBS          | 10        |
| 15  | F   | 0.08             | 0.08            |                     | No           | 8    | 1315C>T       | Arg439Cys | DBS          | 14        |
| 16  | M   | 0.08             |                 | Yes                 |              | 8    | 1315C>T       | Arg439Cys | DBS          | 9         |
| 17  | M   | 0.02             | 0.17            | No                  |              | 8    | 1315C>T       | Arg439Cys | DBS          | 15        |
| 18  | F   | 0.00             | 0.10            |                     |              | 8    | 1316G>A       | Arg439His | DBS          | 6         |
| 19  | F   | 0.01             | 0.01            | No                  | No           | 8    | 1316G>A       | Arg439His | DBS          | 12        |
| 20  | F   | 2.00             |                 |                     |              | 8    | 1316G>A       | Arg439His | DBS          | 16        |
| 21  | M   | prenatal         |                 | No                  |              | 8    | 1316G>A       | Arg439His | DBS          | 9         |
| 22  | F   | 0.17             |                 | Yes                 |              | 8    | 1316G>A       | Arg439His | DBS          | 9         |
| 23  | F   | 0.08             |                 | Yes                 |              | 8    | 1316G>A       | Arg439His | DBS          | 9         |
| 24  | M   | 0.02             |                 | Yes                 |              | 8    | 1316G>A       | Arg439His | DBS          | 9         |
| 25  | F   | 0.08             |                 | Yes                 |              | 8    | 1316G>A       | Arg439His | DBS          | 9         |
| 26  | F   | 0.08             |                 |                     |              | 8    | 1316G>A       | Arg439His | DBS          | 17        |
| 27  | F   | 0.00             | 0.10            |                     | No           | 8    | 1316G>A       | Arg439His | DBS          | 18        |
| 28  | M   | 0.04             |                 | No                  |              | 8    | 1316G>A       | Arg439His | DBS          | 15        |

|    |           |       |               |     |     |   |         |           |        |    |
|----|-----------|-------|---------------|-----|-----|---|---------|-----------|--------|----|
| 29 | F         | 0.02  | died at 1 mo  |     |     | 8 | 1316G>A | Arg439His | DBS    | 15 |
| 30 | F         | 0.17  | died at 13 mo |     |     | 8 | 1316G>A | Arg439His | DBS    | 15 |
| 31 | M         | 0.06  |               | No  |     | 8 | 1316G>A | Arg439His | DBS    | 15 |
| 32 | F         | 0.00  | 0.08          |     | Yes | 8 | 1316G>A | Arg439His | DBS    | 3  |
| 33 | F         | 0.17  | 1.08          |     | No  | 8 | 1316G>A | Arg439His | DBS    | 19 |
| 34 | F         | 0.04  | 0.17          | Yes | No  | 8 | 1316G>A | Arg439His | DBS    | 20 |
| 35 | F         |       | 0.08          |     | Yes | 8 | 1316G>A | Arg439His | DBS    | 4  |
| 36 | F         | 0.15  | 0.15          |     |     | 8 | 1316G>C | Arg439Pro | DBS    | 21 |
| 37 | F         | 0.17  | 0.19          |     | Yes | 8 | 1316G>C | Arg439Pro | DBS    | 21 |
| 38 | M         | 0.92  |               | No  | No  | 8 | 1316G>T | Arg439Leu | DBS    | 22 |
| 39 | F         | 0.83  | 2.50          |     |     | 8 | 1326G>C | Gln442His | DBS    | 17 |
| 40 | M         | 1.00  | 3.00          |     | No  | 8 | 1326G>T | Gln442His | DBS    | 23 |
| 41 | F         | 0.90  | 2.70          |     | No  | 8 | 1326G>T | Gln442His | DBS    | 6  |
| 42 | M         | 3.50  |               | No  | No  | 8 | 1336C>T | His446Tyr | C2H2   | 24 |
| 43 | F         | 0.33  | 1.08          |     | No  | 8 | 1337A>G | His446Arg | C2H2   | 11 |
| 44 | F         | 5.80  | 11.90         |     | No  | 8 | 1338C>A | His446Gln | C2H2   | 18 |
| 45 | F         | 5.70  | 12.00         | No  | No  | 8 | 1338C>A | His446Gln | C2H2   | 18 |
| 46 | F         | 1.60  |               | No  | No  | 8 | 1340A>C | Gln447Pro | Others | 25 |
| 47 | ambiguous | 0.25  | 0.25          |     | Yes | 8 | 1348C>A | His450Asn | C2H2   | 26 |
| 48 | F         | 0.50  | 3.83          |     | No  | 8 | 1348C>T | His450Tyr | C2H2   | 10 |
| 49 | M         | 0.25  |               | No  | Yes | 8 | 1349A>T | His450Leu | C2H2   | 27 |
| 50 | M         | 0.23  |               | No  | Yes | 8 | 1349A>T | His450Leu | C2H2   | 28 |
| 51 | M         | 1.30  | 1.30          | No  | Yes | 8 | 1352C>G | Thr451Arg | Others | 6  |
| 52 | F         | 5.00  |               |     |     | 8 | 1352C>G | Thr451Arg | Others | 9  |
| 53 | M         | 3.00  |               | No  |     | 8 | 1352C>T | Thr451Ile | Others | 29 |
| 54 | F         | 0.25  | 0.25          |     | No  | 9 | 1354G>T | Gly452Cys | Others | 12 |
| 55 | F         | 0.25  | 0.25          |     | No  | 9 | 1354G>T | Gly452Cys | Others | 30 |
| 56 | F         | 10.70 | no (at 10.7)  | No  | No  | 9 | 1363C>T | Pro455Ser | Others | 7  |
| 57 | M         | 0.67  | 3.00          |     | No  | 9 | 1366T>C | Phe456Leu | Others | 10 |
| 58 | M         | 2.00  | 2.00          |     | No  | 9 | 1372T>C | Cys458Arg | C2H2   | 3  |
| 59 | M         | 0.60  | 1.00          | No  | No  | 9 | 1372T>C | Cys458Arg | C2H2   | 6  |
| 60 | M         | 1.00  |               | No  |     | 9 | 1372T>C | Cys458Arg | C2H2   | 9  |
| 61 | M         | 3.17  | 4.33          | No  | Yes | 9 | 1372T>C | Cys458Arg | C2H2   | 12 |



|    |   |       |             |     |     |   |         |           |        |    |
|----|---|-------|-------------|-----|-----|---|---------|-----------|--------|----|
| 62 | M | 0.58  | 1.25        |     | No  | 9 | 1372T>C | Cys458Arg | C2H2   | 31 |
| 63 | M | 2.92  | 4.17        |     | Yes | 9 | 1372T>C | Cys458Arg | C2H2   | 31 |
| 64 | F |       | 2.00        | No  | No  | 9 | 1372T>C | Cys458Arg | C2H2   | 4  |
| 65 | F | 0.08  | 1.67        |     | Yes | 9 | 1381T>C | Cys461Arg | C2H2   | 32 |
| 66 | F | 0.10  | 0.20        |     | Yes | 9 | 1381T>C | Cys461Arg | C2H2   | 6  |
| 67 | F | 0.10  | 1.80        | No  | Yes | 9 | 1381T>C | Cys461Arg | C2H2   | 33 |
| 68 | M | 0.25  |             | Yes |     | 9 | 1381T>C | Cys461Arg | C2H2   | 9  |
| 69 | F | 0.42  | 1.08        |     | Yes | 9 | 1382G>A | Cys461Tyr | C2H2   | 34 |
| 70 | F | 30.00 |             |     |     | 9 | 1388G>A | Arg463Gln | Others | 35 |
| 71 | M | 24.00 | 27.00       |     |     | 9 | 1388G>A | Arg463Gln | Others | 35 |
| 72 | M | 28.00 | 33.00       |     |     | 9 | 1388G>A | Arg463Gln | Others | 35 |
| 73 | M | 16.00 | 17.00       |     |     | 9 | 1388G>A | Arg463Gln | Others | 35 |
| 74 | F | 10.00 |             |     |     | 9 | 1388G>A | Arg463Gln | Others | 9  |
| 75 | F | 30.00 |             |     |     | 9 | 1388G>A | Arg463Gln | Others | 6  |
| 76 | M | 1.50  | no (at 9)   | No  | No  | 9 | 1395C>G | Phe465Leu | Others | 36 |
| 77 | F | 7.00  | no          |     | No  | 9 | 1397C>T | Ser466Phe | Others | 37 |
| 78 | F | 0.60  | 0.90        |     | Yes | 9 | 1399C>G | Arg467Gly | DBS    | 6  |
| 79 | F | 0.90  | 0.90        | Yes | No  | 9 | 1399C>T | Arg467Trp | DBS    | 6  |
| 80 | M | 3.50  | 5.80        |     | Yes | 9 | 1399C>T | Arg467Trp | DBS    | 6  |
| 81 | M | 1.50  | 1.70        | Yes | No  | 9 | 1399C>T | Arg467Trp | DBS    | 6  |
| 82 | F | 0.60  | no (at 2.7) |     | Yes | 9 | 1399C>T | Arg467Trp | DBS    | 6  |
| 83 | F | 1.50  | 1.50        | Yes | No  | 9 | 1399C>T | Arg467Trp | DBS    | 6  |
| 84 | M | 1.50  | 1.50        |     | Yes | 9 | 1399C>T | Arg467Trp | DBS    | 6  |
| 85 | F | 0.30  | 0.80        |     | No  | 9 | 1399C>T | Arg467Trp | DBS    | 6  |
| 86 | F | 0.80  | no (at 2)   |     | No  | 9 | 1399C>T | Arg467Trp | DBS    | 6  |
| 87 | M | 2.00  |             | No  | Yes | 9 | 1399C>T | Arg467Trp | DBS    | 9  |
| 88 | M | 7.00  |             |     | Yes | 9 | 1399C>T | Arg467Trp | DBS    | 9  |
| 89 | M | 0.60  |             | Yes |     | 9 | 1399C>T | Arg467Trp | DBS    | 9  |
| 90 | M | 3.00  |             | Yes |     | 9 | 1399C>T | Arg467Trp | DBS    | 9  |
| 91 | F | 0.00  |             |     |     | 9 | 1399C>T | Arg467Trp | DBS    | 9  |
| 92 | M | 0.02  |             | No  |     | 9 | 1399C>T | Arg467Trp | DBS    | 9  |
| 93 | F |       | no (at 7)   | No  | Yes | 9 | 1399C>T | Arg467Trp | DBS    | 38 |
| 94 | F | 0.50  | 1.75        |     | Yes | 9 | 1399C>T | Arg467Trp | DBS    | 39 |

|     |           |      |              |    |     |   |         |           |     |       |
|-----|-----------|------|--------------|----|-----|---|---------|-----------|-----|-------|
| 95  | F         | 0.33 | 1.67         | No | Yes | 9 | 1399C>T | Arg467Trp | DBS | 12    |
| 96  | M         | 2.67 | 5.58         | No | Yes | 9 | 1399C>T | Arg467Trp | DBS | 12    |
| 97  | F         | 1.50 | 1.50         |    | Yes | 9 | 1399C>T | Arg467Trp | DBS | 12    |
| 98  | F         | 0.50 | 0.50         |    | No  | 9 | 1399C>T | Arg467Trp | DBS | 12    |
| 99  | M         | 0.01 | no (at 1.2)  |    | No  | 9 | 1399C>T | Arg467Trp | DBS | 40    |
| 100 | F         | 1.17 | 1.17         |    | Yes | 9 | 1399C>T | Arg467Trp | DBS | 40    |
| 101 | M         | 0.83 | 1.08         |    | Yes | 9 | 1399C>T | Arg467Trp | DBS | 40    |
| 102 | M         | 4.92 | 4.92         |    | No  | 9 | 1399C>T | Arg467Trp | DBS | 40    |
| 103 | F         | 0.58 | 0.58         |    | No  | 9 | 1399C>T | Arg467Trp | DBS | 40    |
| 104 | M         | 0.58 | 0.58         |    | No  | 9 | 1399C>T | Arg467Trp | DBS | 40    |
| 105 | F         | 4.08 | 4.33         |    | No  | 9 | 1399C>T | Arg467Trp | DBS | 40    |
| 106 | F         | 0.08 | no (at 0.38) |    | No  | 9 | 1399C>T | Arg467Trp | DBS | 40    |
| 107 | M         | 1.42 | no (at 6.6)  |    | Yes | 9 | 1399C>T | Arg467Trp | DBS | 40    |
| 108 | F         | 0.67 | 0.67         |    | No  | 9 | 1399C>T | Arg467Trp | DBS | 40    |
| 109 | M         | 1.83 | 5.17         |    | Yes | 9 | 1399C>T | Arg467Trp | DBS | 40    |
| 110 | F         | 0.58 | 0.58         |    | No  | 9 | 1399C>T | Arg467Trp | DBS | 40    |
| 111 | F         | 1.33 | 7.83         |    | Yes | 9 | 1399C>T | Arg467Trp | DBS | 40    |
| 112 | F         | 0.42 | 1.75         |    | Yes | 9 | 1399C>T | Arg467Trp | DBS | 40    |
| 113 | F         | 0.60 | 0.60         |    |     | 9 | 1399C>T | Arg467Trp | DBS | 16,41 |
| 114 | F         | 1.00 |              |    |     | 9 | 1399C>T | Arg467Trp | DBS | 16,41 |
| 115 | ambiguous | 3.17 | 4.42         |    | No  | 9 | 1399C>T | Arg467Trp | DBS | 10    |
| 116 | ambiguous | 0.01 | 0.05         |    | No  | 9 | 1399C>T | Arg467Trp | DBS | 10    |
| 117 | F         | 0.25 | 2.08         | No | Yes | 9 | 1399C>T | Arg467Trp | DBS | 10    |
| 118 | M         | 3.50 | 4.00         | No | No  | 9 | 1399C>T | Arg467Trp | DBS | 16    |
| 119 | M         | 1.00 | 2.50         | No |     | 9 | 1399C>T | Arg467Trp | DBS | 15    |
| 120 | M         |      | 0.92         | No | No  | 9 | 1399C>T | Arg467Trp | DBS | 4     |
| 121 | M         |      |              | No |     | 9 | 1399C>T | Arg467Trp | DBS | 42    |
| 122 | M         | 0.03 | 0.07         | No | No  | 9 | 1400G>A | Arg467Gln | DBS | 12    |
| 123 | M         | 0.01 | 0.33         |    | No  | 9 | 1400G>A | Arg467Gln | DBS | 14    |
| 124 | M         | 0.17 | 0.42         |    | No  | 9 | 1400G>A | Arg467Gln | DBS | 14    |
| 125 | M         | 0.04 | 0.01         |    | No  | 9 | 1400G>A | Arg467Gln | DBS | 14    |
| 126 | F         | 0.00 | 0.10         |    | No  | 9 | 1400G>A | Arg467Gln | DBS | 6     |
| 127 | M         | 0.00 | 0.10         | No |     | 9 | 1400G>A | Arg467Gln | DBS | 6     |

|     |           |       |              |     |     |   |         |           |        |    |
|-----|-----------|-------|--------------|-----|-----|---|---------|-----------|--------|----|
| 128 | F         | 0.58  | 0.58         |     | No  | 9 | 1400G>C | Arg467Pro | DBS    | 43 |
| 129 | M         | 0.08  | 0.08         |     | No  | 9 | 1400G>C | Arg467Pro | DBS    | 43 |
| 130 | M         | 0.20  | 0.40         | No  | Yes | 9 | 1400G>T | Arg467Leu | DBS    | 6  |
| 131 | M         | 0.42  | 0.58         | No  | Yes | 9 | 1400G>T | Arg467Leu | DBS    | 10 |
| 132 | M         | 0.83  | no           | No  | No  | 9 | 1405G>A | Asp469Asn | Others | 25 |
| 133 | M         | 0.25  | 1.42         |     | No  | 9 | 1405G>A | Asp469Asn | Others | 40 |
| 134 | F         | 1.58  | 3.92         |     | Yes | 9 | 1405G>A | Asp469Asn | Others | 40 |
| 135 | M         | 0.33  | 0.33         |     | No  | 9 | 1405G>A | Asp469Asn | Others | 40 |
| 136 | F         | 1.10  | 2.50         |     | Yes | 9 | 1405G>A | Asp469Asn | Others | 40 |
| 137 | F         | 1.50  | no (at 5)    |     | Yes | 9 | 1405G>A | Asp469Asn | Others | 6  |
| 138 | M         | 0.64  | 0.64         | No  | No  | 9 | 1405G>A | Asp469Asn | Others | 12 |
| 139 | F         | 1.00  | 2.25         |     | No  | 9 | 1405G>A | Asp469Asn | Others | 10 |
| 140 | F         | 0.17  |              |     |     | 9 | 1405G>A | Asp469Asn | Others | 17 |
| 141 | M         | 1.17  | 1.17         | No  | No  | 9 | 1405G>A | Asp469Asn | Others | 4  |
| 142 | F         | 0.08  |              |     |     | 9 | 1405G>A | Asp469Asn | Others | 9  |
| 143 | M         | 0.25  | 0.33         |     | Yes | 9 | 1405G>C | Asp469His | Others | 44 |
| 144 | F         | 0.02  | died at 6 mo |     |     | 9 | 1405G>T | Asp469Tyr | Others | 15 |
| 145 | F         | 0.08  | 0.08         |     |     | 9 | 1405G>T | Asp469Tyr | Others | 19 |
| 146 | F         | 0.33  | 1.00         |     | Yes | 9 | 1406A>G | Asp469Gly | Others | 40 |
| 147 | M         | 0.75  |              | No  |     | 9 | 1408C>T | His470Tyr | DBS    | 9  |
| 148 | F         | 5.25  | 5.25         |     | Yes | 9 | 1409A>C | His470Pro | DBS    | 32 |
| 149 | F         | 1.25  | 9.33         |     | No  | 9 | 1409A>C | His470Pro | DBS    | 32 |
| 150 | F         | 1.10  | 8.70         | No  | No  | 9 | 1409A>C | His470Pro | DBS    | 6  |
| 151 | F         | 1.20  | 6.10         | No  | No  | 9 | 1409A>C | His470Pro | DBS    | 33 |
| 152 | ambiguous | 0.67  | no (at 6)    | No  | No  | 9 | 1412T>C | Leu471Pro | Others | 10 |
| 153 | M         | 7.30  | 11.20        |     | No  | 9 | 1412T>G | Leu471Arg | Others | 6  |
| 154 | F         | 4.83  |              |     | Yes | 9 | 1420C>T | His474Tyr | C2H2   | 45 |
| 155 | F         | 0.30  | 3.40         |     | Yes | 9 | 1421A>G | His474Arg | C2H2   | 6  |
| 156 | F         | 0.50  | 3.80         | No  |     | 9 | 1421A>G | His474Arg | C2H2   | 7  |
| 157 | ambiguous |       | before 2     | No  | No  | 9 | 1422C>A | His474Gln | C2H2   | 46 |
| 158 | M         | 16.00 | no           | No  | No  | 9 | 1427G>A | Arg476Lys | Others | 47 |
| 159 | F         | 1.75  |              |     | Yes | 9 | 1432C>G | His478Asp | C2H2   | 28 |
| 160 | F         | 1.50  | 1.92         | Yes | Yes | 9 | 1433A>G | His478Arg | C2H2   | 48 |

|     |   |      |      |  |  |   |         |           |      |    |
|-----|---|------|------|--|--|---|---------|-----------|------|----|
| 161 | F | 3.00 | 4.00 |  |  | 9 | 1434T>A | His478Gln | C2H2 | 49 |
|-----|---|------|------|--|--|---|---------|-----------|------|----|

## Supplemental Table S2.

reference

1. Yang Y, Feng D, Huang J, Nie X, Yu Z: A child with isolated nephrotic syndrome and WT1 mutation presenting as a 46, XY phenotypic male. *European journal of pediatrics*, 172: 127-129, 2013 10.1007/s00431-012-1770-0
2. Kikuchi H, Akasaka Y, Kurosawa Y, Yoneyama H, Kato S, Hata J: A critical mutation in both WT1 alleles is not sufficient to cause Wilms' tumor. *FEBS Lett*, 360: 26-28, 1995 10.1016/0014-5793(95)00071-g
3. Kikuchi H, Takata A, Akasaka Y, Fukuzawa R, Yoneyama H, Kurosawa Y, et al.: Do intronic mutations affecting splicing of WT1 exon 9 cause Frasier syndrome? *Journal of medical genetics*, 35: 45-48, 1998 10.1136/jmg.35.1.45
4. Takata A, Kikuchi H, Fukuzawa R, Ito S, Honda M, Hata J: Constitutional WT1 correlate with clinical features in children with progressive nephropathy. *Journal of medical genetics*, 37: 698-701, 2000 10.1136/jmg.37.9.698
5. Beltcheva O, Boueva A, Tzveova R, Roussinov D, Marinova S, Kaneva R, et al.: Steroid-resistant nephrotic syndrome caused by novel WT1 mutation inherited from a mosaic parent. *Renal failure*, 38: 290-293, 2016 10.3109/0886022X.2015.1117906
6. Chernin G, Vega-Warner V, Schoeb DS, Heeringa SF, Ovunc B, Saisawat P, et al.: Genotype/phenotype correlation in nephrotic syndrome caused by WT1 mutations. *Clinical journal of the American Society of Nephrology : CJASN*, 5: 1655-1662, 2010 10.2215/CJN.09351209
7. Mucha B, Ozaltin F, Hinkes BG, Hasselbacher K, Ruf RG, Schultheiss M, et al.: Mutations in the Wilms' tumor 1 gene cause isolated steroid resistant nephrotic syndrome and occur in exons 8 and 9. *Pediatric research*, 59: 325-331, 2006 10.1203/01.pdr.0000196717.94518.f0
8. Clarkson PA, Davies HR, Williams DM, Chaudhary R, Hughes IA, Patterson MN: Mutational screening of the Wilms's tumour gene, WT1, in males with genital abnormalities. *Journal of medical genetics*, 30: 767-772, 1993 10.1136/jmg.30.9.767
9. Sadowski CE, Lovric S, Ashraf S, Pabst WL, Gee HY, Kohl S, et al.: A single-gene cause in 29.5% of cases of steroid-resistant nephrotic syndrome. *Journal of the American Society of Nephrology : JASN*, 26: 1279-1289, 2015 10.1681/ASN.2014050489
10. Jeanpierre C, Denamur E, Henry I, Cabanis MO, Luce S, Cecille A, et al.: Identification of constitutional WT1 mutations, in patients with isolated diffuse mesangial sclerosis, and analysis of genotype/phenotype correlations by use of a computerized mutation database. *American journal of human genetics*, 62: 824-833, 1998

10.1086/301806

11. Lehnhardt A, Karnatz C, Ahlenstiel-Grunow T, Benz K, Benz MR, Budde K, et al.: Clinical and molecular characterization of patients with heterozygous mutations in wilms tumor suppressor gene 1. *Clinical journal of the American Society of Nephrology : CJASN*, 10: 825-831, 2015 10.2215/CJN.10141014
12. Schumacher V, Scharer K, Wuhl E, Altrogge H, Bonzel KE, Guschmann M, et al.: Spectrum of early onset nephrotic syndrome associated with WT1 missense mutations. *Kidney international*, 53: 1594-1600, 1998 10.1046/j.1523-1755.1998.00948.x
13. Sen ES, Dean P, Yarram-Smith L, Bierzynska A, Woodward G, Buxton C, et al.: Clinical genetic testing using a custom-designed steroid-resistant nephrotic syndrome gene panel: analysis and recommendations. *Journal of medical genetics*, 54: 795-804, 2017 10.1136/jmedgenet-2017-104811
14. Call KM, Glaser T, Ito CY, Buckler AJ, Pelletier J, Haber DA, et al.: Isolation and characterization of a zinc finger polypeptide gene at the human chromosome 11 Wilms' tumor locus. *Cell*, 60: 509-520, 1990 10.1016/0092-8674(90)90601-a
15. Lee JH, Han KH, Lee H, Kang HG, Moon KC, Shin JI, et al.: Genetic basis of congenital and infantile nephrotic syndromes. *American journal of kidney diseases : the official journal of the National Kidney Foundation*, 58: 1042-1043, 2011 10.1053/j.ajkd.2011.09.007
16. Pelletier J, Bruening W, Kashtan CE, Mauer SM, Manivel JC, Striegel JE, et al.: Germline mutations in the Wilms' tumor suppressor gene are associated with abnormal urogenital development in Denys-Drash syndrome. *Cell*, 67: 437-447, 1991 10.1016/0092-8674(91)90194-4
17. Gbadegesin R, Hinkes BG, Hoskins BE, Vlangos CN, Heeringa SF, Liu J, et al.: Mutations in PLCE1 are a major cause of isolated diffuse mesangial sclerosis (IDMS). *Nephrology, dialysis, transplantation : official publication of the European Dialysis and Transplant Association - European Renal Association*, 23: 1291-1297, 2008 10.1093/ndt/gfm759
18. Royer-Pokora B, Beier M, Henzler M, Alam R, Schumacher V, Weirich A, et al.: Twenty-four new cases of WT1 germline mutations and review of the literature: genotype/phenotype correlations for Wilms tumor development. *American journal of medical genetics Part A*, 127A: 249-257, 2004 10.1002/ajmg.a.30015
19. Hahn H, Cho YM, Park YS, You HW, Cheong HI: Two cases of isolated diffuse mesangial sclerosis with WT1 mutations. *Journal of Korean medical science*, 21: 160-164, 2006 10.3346/jkms.2006.21.1.160

20. Cho HY, Lee BS, Kang CH, Kim WH, Ha IS, Cheong HI, et al.: Hydrothorax in a patient with Denys-Drash syndrome associated with a diaphragmatic defect. *Pediatric nephrology*, 21: 1909-1912, 2006 10.1007/s00467-006-0273-5
21. Fencel F, Malina M, Stara V, Zieg J, Mixova D, Seeman T, et al.: Discordant expression of a new WT1 gene mutation in a family with monozygotic twins presenting with congenital nephrotic syndrome. *European journal of pediatrics*, 171: 121-124, 2012 10.1007/s00431-011-1497-3
22. Tsuda M, Sakiyama T, Owada M, Chiba Y: A newly identified exonic mutation of the WT1 gene in a patient with Denys-Drash syndrome. *Acta Paediatr Jpn*, 38: 265-266, 1996 10.1111/j.1442-200x.1996.tb03483.x
23. Schumacher V, Thumfart J, Drechsler M, Essayie M, Royer-Pokora B, Querfeld U, et al.: A novel WT1 missense mutation presenting with Denys-Drash syndrome and cortical atrophy. *Nephrology, dialysis, transplantation : official publication of the European Dialysis and Transplant Association - European Renal Association*, 21: 518-521, 2006 10.1093/ndt/gfi285
24. Ghahremani M, Chan CB, Bistrizter T, Aladjem MM, Tieder M, Pelletier J: A novel mutation H373Y in the Wilms' tumor suppressor gene, WT1, associated with Denys-Drash syndrome. *Hum Hered*, 46: 336-338, 1996 10.1159/000154374
25. Bezdicka M, Stolbova S, Seeman T, Cinek O, Malina M, Simankova N, et al.: Genetic diagnosis of steroid-resistant nephrotic syndrome in a longitudinal collection of Czech and Slovak patients: a high proportion of causative variants in NUP93. *Pediatric nephrology*, 33: 1347-1363, 2018 10.1007/s00467-018-3950-2
26. Guaragna MS, Soardi FC, Assumpcao JG, Zambaldi Lde J, Cardinalli IA, Yunes JA, et al.: The novel WT1 gene mutation p.H377N associated to Denys-Drash syndrome. *J Pediatr Hematol Oncol*, 32: 486-488, 2010 10.1097/MPH.0b013e3181e5e20d
27. Yue Z, Pei Y, Sun L, Huang W, Huang H, Hu B, et al.: Clinical pictures and novel mutations of WT1-associated Denys-Drash syndrome in two Chinese children. *Renal failure*, 33: 910-914, 2011 10.3109/0886022X.2011.605528
28. Wang HY, Sun LZ, Yue ZH, Yang J, Jiang XY, Mo Y: [Clinical and pathological features of Denys-Drash syndrome: report of 3 cases]. *Zhonghua er ke za zhi Chinese journal of pediatrics*, 50: 855-858, 2012
29. Lipska BS, Ranchin B, Iatropoulos P, Gellermann J, Melk A, Ozaltin F, et al.: Genotype-phenotype associations in WT1 glomerulopathy. *Kidney international*, 85: 1169-1178, 2014 10.1038/ki.2013.519
30. Gessler M, Konig A, Arden K, Grundy P, Orkin S, Sallan S, et al.: Infrequent mutation of the WT1 gene in 77 Wilms' Tumors. *Human mutation*, 3: 212-222, 1994

10.1002/humu.1380030307

31. Patek CE, Little MH, Fleming S, Miles C, Charlieu JP, Clarke AR, et al.: A zinc finger truncation of murine WT1 results in the characteristic urogenital abnormalities of Denys-Drash syndrome. *Proc Natl Acad Sci U S A*, 96: 2931-2936, 1999  
10.1073/pnas.96.6.2931
32. Rose EA, Glaser T, Jones C, Smith CL, Lewis WH, Call KM, et al.: Complete physical map of the WAGR region of 11p13 localizes a candidate Wilms' tumor gene. *Cell*, 60: 495-508, 1990 10.1016/0092-8674(90)90600-j
33. Ruf RG, Schultheiss M, Lichtenberger A, Karle SM, Zalewski I, Mucha B, et al.: Prevalence of WT1 mutations in a large cohort of patients with steroid-resistant and steroid-sensitive nephrotic syndrome. *Kidney international*, 66: 564-570, 2004  
10.1111/j.1523-1755.2004.00775.x
34. Swiatecka-Urban A, Mokrzycki MH, Kaskel F, Da Silva F, Denamur E: Novel WT1 mutation (C388Y) in a female child with Denys-Drash syndrome. *Pediatric nephrology*, 16: 627-630, 2001 10.1007/s004670100626
35. Hall G, Gbadegesin RA, Lavin P, Wu G, Liu Y, Oh EC, et al.: A novel missense mutation of Wilms' Tumor 1 causes autosomal dominant FSGS. *Journal of the American Society of Nephrology : JASN*, 26: 831-843, 2015 10.1681/ASN.2013101053
36. Kaltenis P, Schumacher V, Jankauskiene A, Laurinavicius A, Royer-Pokora B: Slow progressive FSGS associated with an F392L WT1 mutation. *Pediatric nephrology*, 19: 353-356, 2004 10.1007/s00467-003-1372-1
37. Guaragna MS, Lutaif AC, Piveta CS, Belangero VM, Maciel-Guerra AT, Guerra G, Jr., et al.: Two distinct WT1 mutations identified in patients and relatives with isolated nephrotic proteinuria. *Biochem Biophys Res Commun*, 441: 371-376, 2013  
10.1016/j.bbrc.2013.10.064
38. Akasaka Y, Kikuchi H, Nagai T, Hiraoka N, Kato S, Hata J: A point mutation found in the WT1 gene in a sporadic Wilms' tumor without genitourinary abnormalities is identical with the most frequent point mutation in Denys-Drash syndrome. *FEBS Lett*, 317: 39-43, 1993 10.1016/0014-5793(93)81487-k
39. Stallmach T, Neuhaus TJ, Kusters R, Hailemariam S: [Glomerulopathy in Denys-Drash syndrome. Case report of a model disease]. *Pathologe*, 19: 230-234, 1998  
10.1007/s002920050279
40. Hohenstein P, Hastie ND: The many facets of the Wilms' tumour gene, WT1. *Human molecular genetics*, 15 Spec No 2: R196-201, 2006 10.1093/hmg/ddl196
41. Zhu C, Zhao F, Zhang W, Wu H, Chen Y, Ding G, et al.: A familial WT1 mutation associated with incomplete Denys-Drash syndrome. *European journal of pediatrics*,



- 172: 1357-1362, 2013 10.1007/s00431-013-2004-9
42. Bruening W, Bardeesy N, Silverman BL, Cohn RA, Machin GA, Aronson AJ, et al.: Germline intronic and exonic mutations in the Wilms' tumour gene (WT1) affecting urogenital development. *Nat Genet*, 1: 144-148, 1992 10.1038/ng0592-144
  43. Haber DA, Sohn RL, Buckler AJ, Pelletier J, Call KM, Housman DE: Alternative splicing and genomic structure of the Wilms tumor gene WT1. *Proc Natl Acad Sci U S A*, 88: 9618-9622, 1991 10.1073/pnas.88.21.9618
  44. Pritchard-Jones K, Fleming S, Davidson D, Bickmore W, Porteous D, Gosden C, et al.: The candidate Wilms' tumour gene is involved in genitourinary development. *Nature*, 346: 194-197, 1990 10.1038/346194a0
  45. Baird PN, Cowell JK: A novel zinc finger mutation in a patient with Denys-Drash syndrome. *Human molecular genetics*, 2: 2193-2194, 1993 10.1093/hmg/2.12.2193
  46. Baxter RM, Arboleda VA, Lee H, Barseghyan H, Adam MP, Fechner PY, et al.: Exome sequencing for the diagnosis of 46,XY disorders of sex development. *J Clin Endocrinol Metab*, 100: E333-344, 2015 10.1210/jc.2014-2605
  47. Benetti E, Caridi G, Malaventura C, Dagnino M, Leonardi E, Artifoni L, et al.: A novel WT1 gene mutation in a three-generation family with progressive isolated focal segmental glomerulosclerosis. *Clinical journal of the American Society of Nephrology : CJASN*, 5: 698-702, 2010 10.2215/CJN.05670809
  48. Hu M, Craig J, Howard N, Kan A, Chaitow J, Little D, et al.: A novel mutation of WT1 exon 9 in a patient with Denys-Drash syndrome and pyloric stenosis. *Pediatric nephrology*, 19: 1160-1163, 2004 10.1007/s00467-004-1564-3
  49. Bullich G, Trujillano D, Santin S, Ossowski S, Mendizabal S, Fraga G, et al.: Targeted next-generation sequencing in steroid-resistant nephrotic syndrome: mutations in multiple glomerular genes may influence disease severity. *Eur J Hum Genet*, 23: 1192-1199, 2015 10.1038/ejhg.2014.252

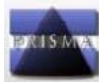

## PRISMA 2020 Checklist

| Section and Topic             | Item # | Checklist item                                                                                                                                                                                                                                                                                       | Location where item is reported |
|-------------------------------|--------|------------------------------------------------------------------------------------------------------------------------------------------------------------------------------------------------------------------------------------------------------------------------------------------------------|---------------------------------|
| <b>TITLE</b>                  |        |                                                                                                                                                                                                                                                                                                      |                                 |
| Title                         | 1      | Identify the report as a systematic review.                                                                                                                                                                                                                                                          | 1                               |
| <b>ABSTRACT</b>               |        |                                                                                                                                                                                                                                                                                                      |                                 |
| Abstract                      | 2      | See the PRISMA 2020 for Abstracts checklist.                                                                                                                                                                                                                                                         | 3                               |
| <b>INTRODUCTION</b>           |        |                                                                                                                                                                                                                                                                                                      |                                 |
| Rationale                     | 3      | Describe the rationale for the review in the context of existing knowledge.                                                                                                                                                                                                                          | 5-6                             |
| Objectives                    | 4      | Provide an explicit statement of the objective(s) or question(s) the review addresses.                                                                                                                                                                                                               | 5-6                             |
| <b>METHODS</b>                |        |                                                                                                                                                                                                                                                                                                      |                                 |
| Eligibility criteria          | 5      | Specify the inclusion and exclusion criteria for the review and how studies were grouped for the syntheses.                                                                                                                                                                                          | 7                               |
| Information sources           | 6      | Specify all databases, registers, websites, organisations, reference lists and other sources searched or consulted to identify studies. Specify the date when each source was last searched or consulted.                                                                                            | 7                               |
| Search strategy               | 7      | Present the full search strategies for all databases, registers and websites, including any filters and limits used.                                                                                                                                                                                 | 7                               |
| Selection process             | 8      | Specify the methods used to decide whether a study met the inclusion criteria of the review, including how many reviewers screened each record and each report retrieved, whether they worked independently, and if applicable, details of automation tools used in the process.                     | 7                               |
| Data collection process       | 9      | Specify the methods used to collect data from reports, including how many reviewers collected data from each report, whether they worked independently, any processes for obtaining or confirming data from study investigators, and if applicable, details of automation tools used in the process. | 7                               |
| Data items                    | 10a    | List and define all outcomes for which data were sought. Specify whether all results that were compatible with each outcome domain in each study were sought (e.g. for all measures, time points, analyses), and if not, the methods used to decide which results to collect.                        | Sup Table S2                    |
|                               | 10b    | List and define all other variables for which data were sought (e.g. participant and intervention characteristics, funding sources). Describe any assumptions made about any missing or unclear information.                                                                                         |                                 |
| Study risk of bias assessment | 11     | Specify the methods used to assess risk of bias in the included studies, including details of the tool(s) used, how many reviewers assessed each study and whether they worked independently, and if applicable, details of automation tools used in the process.                                    | 7                               |
| Effect measures               | 12     | Specify for each outcome the effect measure(s) (e.g. risk ratio, mean difference) used in the synthesis or presentation of results.                                                                                                                                                                  | 11                              |
| Synthesis methods             | 13a    | Describe the processes used to decide which studies were eligible for each synthesis (e.g. tabulating the study intervention characteristics and comparing against the planned groups for each synthesis (item #5)).                                                                                 | 7                               |
|                               | 13b    | Describe any methods required to prepare the data for presentation or synthesis, such as handling of missing summary statistics, or data conversions.                                                                                                                                                |                                 |
|                               | 13c    | Describe any methods used to tabulate or visually display results of individual studies and syntheses.                                                                                                                                                                                               |                                 |
|                               | 13d    | Describe any methods used to synthesize results and provide a rationale for the choice(s). If meta-analysis was performed, describe the model(s), method(s) to identify the presence and extent of statistical heterogeneity, and software package(s) used.                                          |                                 |
|                               | 13e    | Describe any methods used to explore possible causes of heterogeneity among study results (e.g. subgroup analysis, meta-regression).                                                                                                                                                                 |                                 |
|                               | 13f    | Describe any sensitivity analyses conducted to assess robustness of the synthesized results.                                                                                                                                                                                                         |                                 |
| Reporting bias assessment     | 14     | Describe any methods used to assess risk of bias due to missing results in a synthesis (arising from reporting biases).                                                                                                                                                                              | 7                               |
| Certainty assessment          | 15     | Describe any methods used to assess certainty (or confidence) in the body of evidence for an outcome.                                                                                                                                                                                                |                                 |



# PRISMA 2020 Checklist

| Section and Topic                              | Item # | Checklist item                                                                                                                                                                                                                                                                       | Location where item is reported |
|------------------------------------------------|--------|--------------------------------------------------------------------------------------------------------------------------------------------------------------------------------------------------------------------------------------------------------------------------------------|---------------------------------|
| <b>RESULTS</b>                                 |        |                                                                                                                                                                                                                                                                                      |                                 |
| Study selection                                | 16a    | Describe the results of the search and selection process, from the number of records identified in the search to the number of studies included in the review, ideally using a flow diagram.                                                                                         |                                 |
|                                                | 16b    | Cite studies that might appear to meet the inclusion criteria, but which were excluded, and explain why they were excluded.                                                                                                                                                          | 12                              |
| Study characteristics                          | 17     | Cite each included study and present its characteristics.                                                                                                                                                                                                                            | 12                              |
| Risk of bias in studies                        | 18     | Present assessments of risk of bias for each included study.                                                                                                                                                                                                                         | 12                              |
| Results of individual studies                  | 19     | For all outcomes, present, for each study: (a) summary statistics for each group (where appropriate) and (b) an effect estimate and its precision (e.g. confidence/credible interval), ideally using structured tables or plots.                                                     | 12                              |
| Results of syntheses                           | 20a    | For each synthesis, briefly summarise the characteristics and risk of bias among contributing studies.                                                                                                                                                                               | 12                              |
|                                                | 20b    | Present results of all statistical syntheses conducted. If meta-analysis was done, present for each the summary estimate and its precision (e.g. confidence/credible interval) and measures of statistical heterogeneity. If comparing groups, describe the direction of the effect. |                                 |
|                                                | 20c    | Present results of all investigations of possible causes of heterogeneity among study results.                                                                                                                                                                                       |                                 |
|                                                | 20d    | Present results of all sensitivity analyses conducted to assess the robustness of the synthesized results.                                                                                                                                                                           |                                 |
| Reporting biases                               | 21     | Present assessments of risk of bias due to missing results (arising from reporting biases) for each synthesis assessed.                                                                                                                                                              | 12-13                           |
| Certainty of evidence                          | 22     | Present assessments of certainty (or confidence) in the body of evidence for each outcome assessed.                                                                                                                                                                                  | 12-13                           |
| <b>DISCUSSION</b>                              |        |                                                                                                                                                                                                                                                                                      |                                 |
| Discussion                                     | 23a    | Provide a general interpretation of the results in the context of other evidence.                                                                                                                                                                                                    |                                 |
|                                                | 23b    | Discuss any limitations of the evidence included in the review.                                                                                                                                                                                                                      |                                 |
|                                                | 23c    | Discuss any limitations of the review processes used.                                                                                                                                                                                                                                | 18                              |
|                                                | 23d    | Discuss implications of the results for practice, policy, and future research.                                                                                                                                                                                                       |                                 |
| <b>OTHER INFORMATION</b>                       |        |                                                                                                                                                                                                                                                                                      |                                 |
| Registration and protocol                      | 24a    | Provide registration information for the review, including register name and registration number, or state that the review was not registered.                                                                                                                                       |                                 |
|                                                | 24b    | Indicate where the review protocol can be accessed, or state that a protocol was not prepared.                                                                                                                                                                                       | 7                               |
|                                                | 24c    | Describe and explain any amendments to information provided at registration or in the protocol.                                                                                                                                                                                      |                                 |
| Support                                        | 25     | Describe sources of financial or non-financial support for the review, and the role of the funders or sponsors in the review.                                                                                                                                                        | 19                              |
| Competing interests                            | 26     | Declare any competing interests of review authors.                                                                                                                                                                                                                                   | 19                              |
| Availability of data, code and other materials | 27     | Report which of the following are publicly available and where they can be found: template data collection forms; data extracted from included studies; data used for all analyses; analytic code; any other materials used in the review.                                           | Sup Table S2                    |
